# Supplementary material for: Indirect Comparison of Ropinirole and Pramipexole as Levodopa Adjunctive Therapy in Advanced Parkinson’s Disease: A Systematic Review and Network Meta-Analysis
Source: Springer Nature journal article supplement (doi:10.1007/s12325-019-00938-1), 2019-04-08
Supplement: MOESM1 [file 16629480]

**Supplementary Materials:**

Stevens’ method29 was modified functionally because within Stevens’ method it is not easy to handle multi-arms data or meta-regression etc. The results of modified Stevens’ method and the original Stevens’ method for missing standard error are identical. However, the modified method is flexible to use for all situations such as mean difference, data with missing standard deviation as well as a trial-based data including multi-arms data and meta-regression.

When sampling from a normal distribution, we can define **Chi-square distribution**, using the following equation:

(1)

where is chi-square distribution with degrees of freedoms. The study and trial were denoted by *i* and *k* respectively.

From (1), we can have that

(2)

where is a gamma distribution

is assumed to follow as below:

or uniform (-10,10) (3)

If is not missing, we use from data. However, if is missing, we use an estimation from (2)
